# Supplementary material for: Protective Effects of Angiotensin Receptor Blockers on the Incidence of Dementia in Patients with Chronic Kidney Disease: A Population-Based Nationwide Study
Source: MDPI journal article supplement (doi:10.3390/jcm10215175), 2021-11-05
Supplement: s1 [file s1]

| Table S2. Code for disease                                                                                                                                           |                             |                                |
|----------------------------------------------------------------------------------------------------------------------------------------------------------------------|-----------------------------|--------------------------------|
|                                                                                                                                                                      | ICD-9-CM                    | ICD-10-CM                      |
| <i>Comorbidities</i>                                                                                                                                                 |                             |                                |
| Hypertension                                                                                                                                                         | 401 – 405                   | I10-I15                        |
| Diabetes mellitus                                                                                                                                                    | 250                         | E08-E13                        |
| Hyperlipidemia                                                                                                                                                       | 272.0–272.4                 | E78                            |
| Ischemic Heart Disease                                                                                                                                               | 410 – 414                   | I20-I25                        |
| CHF                                                                                                                                                                  | 428.0, 428.1, 428.9         | I50                            |
| Stroke                                                                                                                                                               | 430–438                     | I60-I69                        |
| PAOD                                                                                                                                                                 | 440.2-9, 443.9              | I70.2-I70.9                    |
| COPD                                                                                                                                                                 | 491, 496                    | J44                            |
| Cancer                                                                                                                                                               | 140-208                     | C00.0-C96.9                    |
| Atrial fibrillation                                                                                                                                                  | 427.31                      | I48                            |
| Asthma                                                                                                                                                               | 493                         | J45                            |
| Major Depression Dis-<br>order                                                                                                                                       | 296.2-3                     | F32-F33                        |
| Parkinson's Disease                                                                                                                                                  | 332                         | G20-G21                        |
| Rheumatoid Arthritis                                                                                                                                                 | 714.0, 714.1, 714.2, 714.81 | M05-M06                        |
| Thyrotoxicosis                                                                                                                                                       | 240                         | E05                            |
| Hypothyroidism                                                                                                                                                       | 244, 245.2                  | E01.8, E02-E03                 |
| Insomnia                                                                                                                                                             | 780.51, 780.52              | G47.0, F51.0                   |
| Gout                                                                                                                                                                 | 274                         | M10                            |
| <i>Clinical outcomes</i>                                                                                                                                             |                             |                                |
| Dementia (eligible for<br>Severe Illness for Na-<br>tional Health Insurance<br>Administration IC Card)                                                               | 290                         | F01.50, F01.51, F03.90, F03.91 |
| Abbreviation:                                                                                                                                                        |                             |                                |
| ICD, international classification of disease; CHF, Congestive heart failure; PAOD, Peripheral artery occlusion disease; COPD, Chronic obstructive pulmonary disease. |                             |                                |
