# Supplementary material for: Protective Effects of Angiotensin Receptor Blockers on the Incidence of Dementia in Patients with Chronic Kidney Disease: A Population-Based Nationwide Study
Source: MDPI journal article supplement (doi:10.3390/jcm10215175), 2021-11-05
Supplement: s1 [file s1]

| Table S3.Code for drugs |                                                                                                          |                                                                                                                                                                                                                                                                                                                                                                                         |
|-------------------------|----------------------------------------------------------------------------------------------------------|-----------------------------------------------------------------------------------------------------------------------------------------------------------------------------------------------------------------------------------------------------------------------------------------------------------------------------------------------------------------------------------------|
| Drug type               | ATC classification system codes                                                                          | Drug name                                                                                                                                                                                                                                                                                                                                                                               |
| ARB                     | C09C, C09D                                                                                               | Losartan, Eprosartan, Valsartan, Irbesartan, Candesartan, Telmisartan, Olmesartan, Azilsartan                                                                                                                                                                                                                                                                                           |
| NSAID                   | M01AB, M01AC, M01AE, M01AG, M01AH, M01AX01                                                               | Indomethacin, Sulindac, Tolmetin, Diclofenac, Alclofenac, Etodolac, Acemetacin, Ketorolac, Aceclofenac, Piroxicam, Tenoxicam, Meloxicam, Ibuprofen, Naproxen, Ketoprofen, Fenoprofen, Fenbufen, Flurbiprofen, Tiaprofenic Acid, Alminoprofen, Naproxen, Mefenamic Acid,,Tolfenamic Acid Flufenamic Acid, Meclofenamic Acid, Celecoxib, Rofecoxib, Etoricoxib, Nabumetone, Niflumic Acid |
| Acetaminophen           | M03BA52, M03BB03, M03BB52, M03BB53, M03BC01, M03BC51, N02AC, N02AX52, N02BA57, N02BE, R05X               | Acetaminophen                                                                                                                                                                                                                                                                                                                                                                           |
| Anti-platelet agents    | B01AC, M01BA03, N02AB, N02BA01, N02BA51                                                                  | Clopidogrel, Ticlopidine, Acetylsalicylic Acid, Dipyridamole, Epoprostenol, Iloprost, Abciximab, Eptifibatide, Tirofiban, Treprostinil, Prasugrel, Cilostazol, Ticagrelor, Selexipag,                                                                                                                                                                                                   |
| Anticoagulants          | B01AA, B01AB                                                                                             | Phenindione, Warfarin, Heparin, Dalteparin, Enoxaparin, Nadroparine, Tinzaparin                                                                                                                                                                                                                                                                                                         |
| Benzodiazepines         | N05BA, N05CD                                                                                             | Diazepam, Chlordiazepoxide, Medazepam, Oxazepam, Clorazepate, Lorazepam, Bromazepam, Clobazam, Prazepam, Alprazolam, Nordazepam, Fludiazepam, Cloxazolam, Oxazolam, Flurazepam, Nitrazepam, Flunitrazepam, Estazolam, Triazolam, Lormetazepam, Temazepam, Midazolam, Brotizolam, Nimetazepam                                                                                            |
| Insulin                 | A10A                                                                                                     | Insulin                                                                                                                                                                                                                                                                                                                                                                                 |
| Statin                  | C10AA                                                                                                    | Simvastatin, Lovastatin, Pravastatin, Fluvastatin, Atorvastatin, Rosuvastatin, Pitavastatin                                                                                                                                                                                                                                                                                             |
| Metformin               | A10BA02, A10BD, A10BD02, A10BD03, A10BD05, A10BD07, A10BD08, A10BD10, A10BD11, A10BD13, A10BD15, A10BD20 | Metformin                                                                                                                                                                                                                                                                                                                                                                               |

|                                                                                                                                                                |                                                         |                                                                                                                                                                                                                                                                                 |
|----------------------------------------------------------------------------------------------------------------------------------------------------------------|---------------------------------------------------------|---------------------------------------------------------------------------------------------------------------------------------------------------------------------------------------------------------------------------------------------------------------------------------|
| ACEI                                                                                                                                                           | C09A, C09B                                              | Captopril, Enalapril, Lisinopril, Perindopril, Ramipril, Quinapril, Benazepril, Cilazapril, Fosinopril, Imidapril                                                                                                                                                               |
| Beta blocking agents                                                                                                                                           | C07A, C07B, C07CA03, C07DA06                            | Alprenolol, Oxprenolol, Pindolol, Propranolol, Timolol, Sotalol, Nadolol, Carteolol, Bupranolol, Metoprolol, Atenolol, Acebutolol, Betaxolol, Bevantolol, Bisoprolol, Esmolol, Nebivolol, Labetalol, Carvedilol                                                                 |
| CCB                                                                                                                                                            | C08C, C08D, C09BB, C09DB, C09DX01, C09DX03 C09XA, C10BX | Amlopidine, Felodipine, Isradipine, Nicardipine, Nifedipine, Nimodipine, Nisoldipine, Nitrendipine, Lacidipine, Barnidipine, Lercanidipine, Cilnidipine, Benidipine, Verapamil, Diltiazem                                                                                       |
| Diuretic                                                                                                                                                       | C03A, C03B, C03C, C03D, C03E, B05BC9                    | Bendroflumethiazide, Hydrochlorothiazide, Trichlormethiazide, Cyclopenthiazide, Benzylhydrochlorothiazide, Chlorthalidone, Metolazone, Indapamide, Furosemide, Bumetanide Torsemide, Ethacrynic Acid, Potassium Canrenoate, Spironolactone, Eplerenone, Amiloride, Triamterene, |
| Abbreviation:                                                                                                                                                  |                                                         |                                                                                                                                                                                                                                                                                 |
| ARB, Angiotensin receptor blockers; NSAID, Non-Steroidal Anti-Inflammatory Drug; ACEI, Angiotensin-converting enzyme inhibitors; CCB, Calcium channel blockers |                                                         |                                                                                                                                                                                                                                                                                 |
