# Supplementary material for: Protective Effects of Angiotensin Receptor Blockers on the Incidence of Dementia in Patients with Chronic Kidney Disease: A Population-Based Nationwide Study
Source: MDPI journal article supplement (doi:10.3390/jcm10215175), 2021-11-05
Supplement: s1 [file s1]

**Table S1. Diagnosis Code for Chronic Kidney Disease in the thematic CKD cohort**

| ICD9CM | Description                                                                                                                                                            |
|--------|------------------------------------------------------------------------------------------------------------------------------------------------------------------------|
| 016.0  |                                                                                                                                                                        |
| 01600  | Tuberculosis of kidney, unspecified                                                                                                                                    |
| 01601  | Tuberculosis of kidney, bacteriological or histological examination not done                                                                                           |
| 01602  | Tuberculosis of kidney, bacteriological or histological examination unknown (at present)                                                                               |
| 01603  | Tuberculosis of kidney, tubercle bacilli found (in sputum) by microscopy                                                                                               |
| 01604  | Tuberculosis of kidney, tubercle bacilli not found (in sputum) by microscopy, but found by bacterial culture                                                           |
| 01605  | Tuberculosis of kidney, tubercle bacilli not found by bacteriological examination, but tuberculosis confirmed                                                          |
| 01606  | Tuberculosis of kidney, tubercle bacilli not found by bacteriological or histological examination but tuberculosis confirmed by other methods [inoculation of animals] |
| 095.4  |                                                                                                                                                                        |
| 0954   | Syphilis of kidney                                                                                                                                                     |
| 189    |                                                                                                                                                                        |
| 1890   | Malignant neoplasm of kidney, except pelvis                                                                                                                            |
| 1891   | Malignant neoplasm of renal pelvis                                                                                                                                     |
| 189.9  |                                                                                                                                                                        |
| 1899   | Malignant neoplasm of urinary organ, site unspecified                                                                                                                  |
| 223.0  |                                                                                                                                                                        |
| 2230   | Benign neoplasm of kidney, except pelvis                                                                                                                               |
| 236.91 |                                                                                                                                                                        |
| 23691  | Neoplasm of uncertain behavior of kidney and ureter                                                                                                                    |
| 250.4  |                                                                                                                                                                        |
| 25040  | Diabetes with renal manifestations, Type II [non-insulin dependent type][NIDDM type][adult-onset type] or unspecified type ,not stated as uncontrolled                 |
| 25041  | Diabetes with renal manifestations, Type I [insulin dependent type][IDDM][juvenile type], not stated as uncontrolled                                                   |
| 25042  | Diabetes with renal manifestations, Type II [non-insulin dependent type][NIDDM type][adult-onset type] or unspecified type, uncontrolled                               |
| 25043  | Diabetes with renal manifestations, Type I [insulin dependent type][IDDM][juvenile type], not stated as uncontrolled                                                   |
| 255.1  |                                                                                                                                                                        |
| 2551   | Hyperaldosteronism (Bartter's syndrome)                                                                                                                                |
| 270.8  |                                                                                                                                                                        |
| 2708   | Other specified disorders of amino-acid metabolism                                                                                                                     |
| 271.0  |                                                                                                                                                                        |
| 2710   | Glycogenosis                                                                                                                                                           |

**Table S1. Diagnosis Code for Chronic Kidney Disease in the thematic CKD cohort**

| ICD9CM | Description                                                                                                         |
|--------|---------------------------------------------------------------------------------------------------------------------|
| 271.4  |                                                                                                                     |
| 271.4  | Renal glycosuria                                                                                                    |
| 272.7  |                                                                                                                     |
| 2727   | Lipidoses                                                                                                           |
| 274.1  |                                                                                                                     |
| 27410  | Gouty nephropathy, unspecified                                                                                      |
| 27411  | Uric acid nephrolithiasis                                                                                           |
| 27419  | Other gouty nephropathy                                                                                             |
| 283.11 |                                                                                                                     |
| 28311  | Non-autoimmune hemolytic anemias,<br>Hemolytic-uremic                                                               |
| 403    |                                                                                                                     |
| 40300  | Malignant hypertensive renal disease without mention<br>of renal failure                                            |
| 40301  | Malignant hypertensive renal disease with renal failure                                                             |
| 40310  | Benign hypertensive renal disease without mention of                                                                |
| 40311  | Benign hypertensive renal disease with renal failure                                                                |
| 40390  | Unspecified hypertensive renal disease without mention<br>of renal failure                                          |
| 40391  | Unspecified hypertensive renal disease with renal<br>failure                                                        |
| 404    |                                                                                                                     |
| 40400  | Malignant hypertensive heart and renal disease without<br>mention of congestive heart failure or renal failure      |
| 40401  | Malignant hypertensive heart and renal disease with<br>congestive heart failure                                     |
| 40402  | Malignant hypertensive heart and renal disease with<br>renal failure                                                |
| 40403  | Malignant hypertensive heart and renal disease with<br>congestive heart failure and renal failure                   |
| 40410  | Benign hypertensive heart and renal disease without<br>mention of congestive heart failure or renal failure         |
| 40411  | Benign hypertensive heart and renal disease with<br>congestive heart failure                                        |
| 40412  | Benign hypertensive heart and renal disease with renal<br>failure                                                   |
| 40413  | Benign hypertensive heart and renal disease with<br>congestive heart failure and renal failure                      |
| 40490  | Unspecified hypertensive heart and renal disease<br>without mention of congestive heart failure or renal<br>failure |
| 40491  | Unspecified hypertensive heart and renal disease with<br>congestive heart failure                                   |
| 40492  | Unspecified hypertensive heart and renal disease with<br>renal failure                                              |
| 40493  | Unspecified hypertensive heart and renal disease with<br>congestive heart failure and renal failure                 |

**Table S1. Diagnosis Code for Chronic Kidney Disease in the thematic CKD cohort**

| ICD9CM | Description                                                                            |
|--------|----------------------------------------------------------------------------------------|
| 440.1  |                                                                                        |
| 4401   | Atherosclerosis of renal artery                                                        |
| 442.1  |                                                                                        |
| 4421   | Aneurysm of renal artery                                                               |
| 447.3  |                                                                                        |
| 4473   | Hyperplasia of renal artery                                                            |
| 572.4  |                                                                                        |
| 5724   | Hepatorenal syndrome                                                                   |
| 580    |                                                                                        |
| 5800   | Acute glomerulonephritis, with lesion of proliferative glomerulonephritis              |
| 5804   | Acute glomerulonephritis with lesion of rapidly progressive glomerulonephritis         |
| 58081  | Acute glomerulonephritis in diseases classified elsewhere                              |
| 58089  | Acute glomerulonephritis with other specified pathological lesion in kidney            |
| 5809   | Acute glomerulonephritis with unspecified pathological lesion in kidney                |
| 581    |                                                                                        |
| 5810   | Nephrotic syndrome, with lesion of proliferative                                       |
| 5811   | Nephrotic syndrome, with lesion of membranous                                          |
| 5812   | Nephrotic syndrome, with lesion of membranous proliferative glomerulonephritis         |
| 5813   | Nephritic syndrome, with lesion of minimal change glomerulonephritis                   |
| 58181  | Nephrotic syndrome in diseases classified elsewhere                                    |
| 58189  | Nephrotic syndrome, with other specified pathological lesion in kidney                 |
| 5819   | Nephrotic syndrome with unspecified pathological lesion in kidney                      |
| 582    |                                                                                        |
| 5820   | Chronic glomerulonephritis, with lesion of proliferative glomerulonephritis            |
| 5821   | Chronic glomerulonephritis, with lesion of membranous glomerulonephritis               |
| 5822   | Chronic glomerulonephritis, with lesion of membranous glomerulonephritis               |
| 5823   | Chronic glomerulonephritis, with lesion of membranous proliferative glomerulonephritis |
| 5824   | Chronic glomerulonephritis, with lesion of rapidly progressive glomerulonephritis      |
| 58281  | Chronic glomerulonephritis in diseases classified elsewhere                            |
| 58289  | Chronic glomerulonephritis, with other specified pathological lesion in kidney         |
| 5829   | Chronic glomerulonephritis with unspecified                                            |

**Table S1. Diagnosis Code for Chronic Kidney Disease in the thematic CKD cohort**

| ICD9CM | Description                                                                                                              |
|--------|--------------------------------------------------------------------------------------------------------------------------|
|        | pathological lesion in kidney                                                                                            |
| 583    |                                                                                                                          |
| 5830   | Nephritis and nephropathy, not specified as acute or chronic, with lesion of proliferative glomerulonephritis            |
| 5831   | Nephritis and nephropathy, not specified as acute or chronic, with lesion of membranous glomerulonephritis               |
| 5832   | Nephritis and nephropathy, not specified as acute or chronic, with lesion of membranous proliferative glomerulonephritis |
| 5834   | Nephritis and nephropathy, not specified as acute or chronic, with lesion of rapidly progressive glomerulonephritis      |
| 5836   | Nephritis and nephropathy, not specified as acute or chronic, with lesion of renal cortical necrosis                     |
| 5837   | Nephritis and nephropathy, not specified as acute or chronic, with lesion of renal medullary necrosis                    |
| 58381  | Nephritis and nephropathy, not specified as acute or chronic, in diseases classified elsewhere                           |
| 58389  | Nephritis and nephropathy, not specified as acute or chronic, with other specified pathological lesion in kidney         |
| 5839   | Nephritis and nephropathy, not specified as acute or chronic, with unspecified pathological lesion in kidney             |
| 584    |                                                                                                                          |
| 5845   | Acute renal failure, with lesion of tubular necrosis                                                                     |
| 5846   | Acute renal failure, with lesion of renal cortical necrosis                                                              |
| 5847   | Acute renal failure, with lesion of renal medullary (papillary) necrosis                                                 |
| 5848   | Acute renal failure, with other specified pathological lesion in kidney                                                  |
| 5849   | Acute renal failure, unspecified                                                                                         |
| 585    |                                                                                                                          |
| 585    | Chronic renal failure                                                                                                    |
| 586    |                                                                                                                          |
| 586    | Renal failure, unspecified                                                                                               |
| 587    |                                                                                                                          |
| 587    | Renal sclerosis, unspecified                                                                                             |
| 588    |                                                                                                                          |
| 5880   | Renal osteodystrophy                                                                                                     |
| 5881   | Nephrogenic diabetes insipidus                                                                                           |
| 5888   | Other specified disorders resulting from impaired renal function                                                         |
| 5889   | Unspecified disorder resulting from impaired renal function                                                              |
| 589    |                                                                                                                          |
| 5891   | Bilateral small kidneys of unknown cause                                                                                 |
| 5899   | Small kidney of unknown cause, unspecified                                                                               |
| 591    |                                                                                                                          |

**Table S1. Diagnosis Code for Chronic Kidney Disease in the thematic CKD cohort**

| ICD9CM | Description                                                                                                                                                 |
|--------|-------------------------------------------------------------------------------------------------------------------------------------------------------------|
| 591    | Hydronephrosis                                                                                                                                              |
| 593    |                                                                                                                                                             |
| 5933   | Stricture or kinking of ureter                                                                                                                              |
| 5939   | Unspecified disorder of kidney and ureter                                                                                                                   |
| 599.6  |                                                                                                                                                             |
| 5996   | Urinary obstruction, unspecified                                                                                                                            |
| 642.1  |                                                                                                                                                             |
| 64210  | Hypertension secondary to renal disease, complicating pregnancy, childbirth, and the puerperium, unspecified as to episode of care or not applicable        |
| 64211  | Hypertension secondary to renal disease, complicating pregnancy, childbirth, and the puerperium, delivered, with or without mention of antepartum condition |
| 64212  | Hypertension secondary to renal disease, complicating pregnancy, childbirth, and the puerperium, delivered, with mention of postpartum complication         |
| 64213  | Hypertension secondary to renal disease, complicating pregnancy, childbirth, and the puerperium, antepartum condition or complication                       |
| 64214  | Hypertension secondary to renal disease, complicating pregnancy, childbirth, and the puerperium, postpartum condition or complication                       |
| 646.2  |                                                                                                                                                             |
| 64620  | Unspecified renal disease in pregnancy, without mention of hypertension, unspecified as to episode of care or not                                           |
| 64621  | Unspecified renal disease in pregnancy, without mention of hypertension, delivered, with or without mention of antepartum condition                         |
| 64622  | Unspecified renal disease in pregnancy, without mention of hypertension, delivered, with mention of postpartum                                              |
| 64623  | Unspecified renal disease in pregnancy, without mention of hypertension, antepartum condition or complication                                               |
| 64624  | Unspecified renal disease in pregnancy, without mention of hypertension, postpartum condition or complication                                               |
| 753    |                                                                                                                                                             |
| 7530   | Renal agenesis and dysgenesis                                                                                                                               |
| 75312  | Polycystic kidney, unspecified type                                                                                                                         |
| 75313  | Polycystic kidney, autosomal dominant                                                                                                                       |
| 75314  | Polycystic kidney, autosomal recessive                                                                                                                      |
| 75315  | Renal dysplasia                                                                                                                                             |
| 75316  | Medullary cystic kidney                                                                                                                                     |
| 75317  | Medullary sponge kidney                                                                                                                                     |
| 75319  | Other specified cystic kidney disease                                                                                                                       |

**Table S1. Diagnosis Code for Chronic Kidney Disease in the thematic CKD cohort**

| ICD9CM | Description                                               |
|--------|-----------------------------------------------------------|
| 753.2  |                                                           |
| 75320  | Unspecified obstructive defect of renal pelvis and ureter |
| 75321  | Congenital obstruction of ureteropelvic junction          |
| 75322  | Congenital obstruction of ureterovesical junction         |
| 75329  | Other obstructive defect of renal pelvis and ureter       |
| 7533   | Other specified anomalies of kidney                       |
| 759.5  |                                                           |
| 7595   | Tuberous sclerosis                                        |
| 794.4  |                                                           |
| 7944   | Nonspecific abnormal results of function studies, kidney  |
| 984.9  |                                                           |
| 9849   | Toxic effect of unspecified lead compound Lead            |
| V-code |                                                           |
| V420   | Kidney replaced by transplant                             |
| V451   | Renal dialysis status                                     |
| V594   | Donors of kidney                                          |

Source: "Chronic Kidney Disease Prevention Technology Research Project" of National Health Administration, Ministry of Health and Welfare in Taiwan
